# Supplementary material for: Validating the Nernst–Planck transport model under reaction-driven flow conditions using RetroPy v1.0
Source: Copernicus journal article supplement (doi:10.5194/egusphere-2022-1205), 2022-11-30
Supplement: Supplementary file [file egusphere-2022-1205-RC1-supplement.pdf]

## Referee's report on the paper

### *Validating the Nernst-Planck transport model under reaction-driven flow conditions using RetroPy v1.0*

Po-Wei Huang, Bernd Flemisch, Chao-Zhong Qin,  
Martin O. Saar, and Anozie Ebigbo

The authors study the transport with electrodiffusion in continuous media, in the two-dimensional case, 2D. They start with the continuity equations

$$\frac{\partial C_i}{\partial t} + \nabla \cdot J_i = 0, \quad i = 1, \dots, N - 1, \quad (1)$$

where  $C_i$  mean concentrations and the fluxes  $J_i$  are composed of three parts: Fick's part, Nernst-Planck's part and Darken's part as follows

$$J_i = -D_i \nabla C_i + \frac{z_i C_i D_i F}{RT} E + C_i u, \quad i = 1, \dots, N - 1. \quad (2)$$

Darken's velocity  $u$  fulfills Darcy's law

$$u = -\frac{k}{\eta} (\nabla p - \rho g) \quad (3)$$

and the incompressibility condition holds

$$\nabla \cdot (\rho u) = 0. \quad (4)$$

Under the electroneutral condition

$$\sum_{i=1}^{N-1} z_i C_i = 0, \quad (5)$$

the system (1) leads to the stationary equation

$$-\nabla \cdot \left( \sum_{i=1}^{N-1} \frac{D_i C_i (z_i F)^2}{RT} E - \sum_{i=1}^{N-1} D_i z_i F \nabla C_i \right) = 0. \quad (6)$$

The authors postulate, by the paper due to Tabrizinejadas et al., 2021, that the electric field has the form

$$E = \frac{RT \sum_{i=1}^{N-1} d_i z_i \nabla C_i}{F \sum_{i=1}^{N-1} (z_i)^2 D_k C_k}. \quad (7)$$

Here is a very big mistake! The formula (7) is true in the 1D case only, if for example  $\sum_{i=1}^{N-1} z_i J_i = 0$  on the boundary of a domain. Then (7) is implied by (6) - see the paper:

1. Bernard P. Boudreau, Filip J.R. Meysman, Jack J. Middelburg, *Multicomponent ionic diffusion in porewaters: Coulombic effects revisited*, Earth and Planetary Science Letters 222 (2004), 653-666.

Tabrizinejadas et al., 2021 study the 1D, 2D and 3D models and they refer to the paper 1., so they are right in 1D only. I understand that the authors get some pictures, but mathematics has its laws.

In 2D and 3D we can for example assume that  $E$  is an irrotational vector field,  $\nabla \times E = 0$ , and then  $E$  is a potential field

$$E = -\nabla\varphi. \quad (8)$$

This equation together with (6) imply the Poisson equation on  $\varphi$  of the form

$$\nabla \cdot \left( \sum_{i=1}^{N-1} \frac{D_i C_i (z_i F)^2}{RT} \nabla\varphi + \sum_{i=1}^{N-1} D_i z_i F \nabla C_i \right) = 0. \quad (9)$$

I refer the authors to the papers in which a similar situation appears, but with the drift  $u$  instead of the electric field  $E$ :

2. B. Bożek, L. Sapa, K. Tkacz-Śmiech, M. Zajusz, M. Danielewski, *Compendium about multicomponent interdiffusion in two dimensions*, Metallurgical and Materials Transactions A 52A (2021), 3221-3231.
3. L. Sapa, B. Bożek, K. Tkacz-Śmiech, M. Zajusz, M. Danielewski, *Interdiffusion in many dimensions: mathematical models, numerical simulations and experiment*, Mathematics and Mechanics of Solids 25 (2020), 2178-2198.
4. B. Bożek, L. Sapa, M. Danielewski, *Difference methods to one and multi-dimensional interdiffusion models with Vegard rule*, Mathematical Modelling and Analysis 24 (2019), 276-296.

The paper has an engineering and numerical nature, and is interesting. But the error I mentioned above must be reliably described and explained, even if the authors are currently unable to do calculations in 2D and 3D with the equation (9). I suggest to start with experiments and calculations in 1D. Moreover, the jump operator  $[\bullet]$  should be defined and it would be better to write  $c_i$  instead of  $C_i$ . Domain dimension in experiments and calculations should be written in Abstract.

#### CONCLUSION

The paper need a major revision.
